# Supplementary material
Source: PubMed Central journal article supplement (PMC2853211)
Supplement: 00715.2009_1.pdf [file 00715.2009_1.pdf]

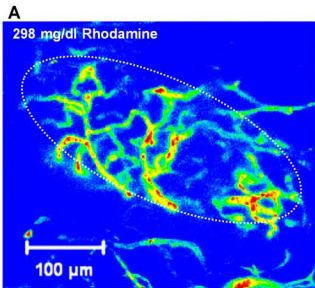

Hyperglycemia Injection Rhodamine

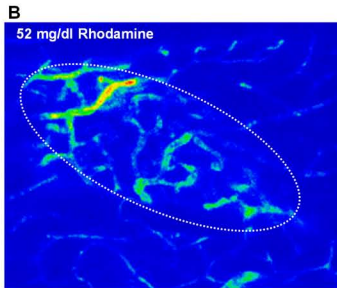

Hypoglycemia Injection Rhodamine

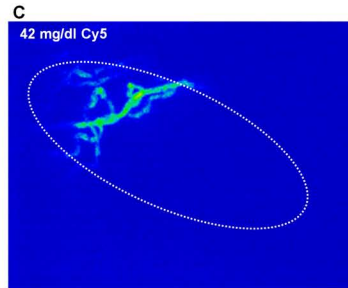

Hypoglycemia Injection Cy5
